# Supplementary material
Source: publisher figshare collection journal article supplement (https://acs.figshare.com/ndownloader/files/12285395)
Supplement: Supplementary file 1 [file 12285395]

## **SUPPLEMENTAL INFORMATION**

### **Fecal indicator bacteria along multiple environmental transmission pathways (water, hands, food, soil, flies) and subsequent child diarrhea in rural Bangladesh**

Amy J. Pickering<sup>\*1,2</sup>, Ayse Ercumen<sup>\*3</sup>, Benjamin F. Arnold<sup>3</sup>, Laura H. Kwong<sup>1</sup>, Sarker Masud Parvez<sup>5</sup>, Mahfuja Alam<sup>5</sup>, Debashis Sen<sup>5</sup>, Sharmin Islam<sup>5</sup>, Craig Kullmann<sup>6</sup>, Claire Chase<sup>6</sup>, Rokeya Ahmed<sup>7</sup>, Leanne Unicom<sup>5</sup>, John M. Colford Jr.<sup>3</sup>, Stephen P. Luby<sup>1</sup>

\*Co-primary author with equal contribution

1. Woods Institute for the Environment, Stanford University, Stanford, CA, USA
2. Civil and Environmental Engineering, Tufts University, Medford, MA, USA
3. Division of Epidemiology, School of Public Health, University of California, Berkeley, CA, USA
4. Civil and Environmental Engineering, Stanford University, Stanford, CA, USA
5. Infectious Disease Division, icddr,b, Bangladesh
6. Water Global Practice, World Bank, Washington DC, USA
7. Water Global Practice, World Bank, Dhaka, Bangladesh

Pages: 7

Tables: S1-S6

Corresponding author: Amy J. Pickering, Science and Engineering Complex, 200 College Ave, Tufts University, Medford, MA, 02155, email: [amyjanel@gmail.com](mailto:amyjanel@gmail.com), phone: 617-627-5163

**Table S1** Bivariate associations between *E. coli* contamination along each pathway and diarrhea (World Health Organization defined). Incidence rate ratio (IRR; prospective analysis) and prevalence ratio (PR; cross-sectional analysis) estimates generated with generalized linear models. All models include robust standard errors at cluster level and adjust for season, monthly income, mother's education, and study arm. Prospective models also include an offset for child days at risk; n = number of children included in analysis.

|              |                           |      | Prospective |        |      |         |      | Cross-Sectional |        |      |         |
|--------------|---------------------------|------|-------------|--------|------|---------|------|-----------------|--------|------|---------|
| Pathway      | Indicator                 | n    | IRR         | 95% CI |      | P-value | n    | PR              | 95% CI |      | P-value |
| Tubewell     | % positive <i>E. coli</i> | 1757 | 0.88        | 0.62   | 1.25 | 0.485   | 1993 | 1.16            | 0.94   | 1.44 | 0.161   |
|              | log MPN <i>E. coli</i>    | 1757 | 0.75        | 0.56   | 1.00 | 0.048   | 1993 | 1.12            | 0.98   | 1.27 | 0.110   |
| Stored water | % positive <i>E. coli</i> | 1703 | 0.85        | 0.62   | 1.19 | 0.351   | 1941 | 0.84            | 0.66   | 1.07 | 0.155   |
|              | log MPN <i>E. coli</i>    | 1703 | 0.92        | 0.80   | 1.07 | 0.307   | 1941 | 0.92            | 0.82   | 1.04 | 0.177   |
| Hands        | % positive <i>E. coli</i> | 1875 | 1.51        | 1.17   | 1.95 | 0.002   | 2130 | 1.10            | 0.91   | 1.34 | 0.339   |
|              | log MPN <i>E. coli</i>    | 1875 | 1.23        | 1.06   | 1.43 | 0.008   | 2130 | 1.09            | 0.97   | 1.21 | 0.153   |
| Food         | % positive <i>E. coli</i> | 1731 | 1.30        | 0.99   | 1.70 | 0.060   | 1966 | 1.02            | 0.83   | 1.25 | 0.829   |
|              | log MPN <i>E. coli</i>    | 1731 | 1.11        | 0.99   | 1.25 | 0.069   | 1966 | 1.03            | 0.94   | 1.12 | 0.539   |
| Flies        | % positive <i>E. coli</i> | 1928 | 1.16        | 0.81   | 1.66 | 0.410   | 2185 | 1.00            | 0.78   | 1.28 | 0.982   |
|              | log MPN <i>E. coli</i>    | 1928 | 1.07        | 0.93   | 1.23 | 0.359   | 2185 | 1.01            | 0.91   | 1.11 | 0.868   |
| Pond         | log MPN <i>E. coli</i>    | 1864 | 0.97        | 0.85   | 1.11 | 0.703   | 2113 | 1.07            | 0.99   | 1.17 | 0.101   |
| Soil         | log MPN <i>E. coli</i>    | 1900 | 1.01        | 0.89   | 1.14 | 0.864   | 2153 | 1.09            | 1.00   | 1.19 | 0.056   |

**Table S2** Bivariate associations between *E. coli* contamination in each pathway and caregiver-defined diarrhea. Incident rate ratio (IRR; prospective analysis) and prevalence ratio (PR; cross-sectional analysis) estimates generated with generalized linear models. All models include robust standard errors at cluster level and adjust for season, monthly income, mother's education, and study arm. Prospective models also include an offset for child days at risk; n = number of children included in analysis.

| Pathway      | Indicator                 | n    | Prospective |        |      |         | n    | Cross-sectional |        |      |         |
|--------------|---------------------------|------|-------------|--------|------|---------|------|-----------------|--------|------|---------|
|              |                           |      | IRR         | 95% CI |      | P-value |      | PR              | 95% CI |      | P-value |
| Tubewell     | % positive <i>E. coli</i> | 1848 | 0.84        | 0.58   | 1.22 | 0.365   | 1991 | 1.06            | 0.80   | 1.41 | 0.663   |
|              | log MPN <i>E. coli</i>    | 1848 | 0.82        | 0.62   | 1.10 | 0.190   | 1991 | 1.04            | 0.88   | 1.25 | 0.626   |
| Stored water | % positive <i>E. coli</i> | 1795 | 0.87        | 0.59   | 1.28 | 0.476   | 1939 | 0.76            | 0.57   | 1.03 | 0.074   |
|              | log MPN <i>E. coli</i>    | 1795 | 0.98        | 0.83   | 1.17 | 0.850   | 1939 | 0.98            | 0.85   | 1.12 | 0.718   |
| Hands        | % positive <i>E. coli</i> | 1971 | 1.52        | 1.12   | 2.07 | 0.007   | 2128 | 1.14            | 0.92   | 1.42 | 0.243   |
|              | log MPN <i>E. coli</i>    | 1971 | 1.31        | 1.11   | 1.55 | 0.002   | 2128 | 1.05            | 0.92   | 1.19 | 0.482   |
| Food         | % positive <i>E. coli</i> | 1820 | 1.16        | 0.84   | 1.60 | 0.365   | 1964 | 1.27            | 0.97   | 1.66 | 0.081   |
|              | log MPN <i>E. coli</i>    | 1820 | 1.10        | 0.96   | 1.26 | 0.161   | 1964 | 1.09            | 0.99   | 1.21 | 0.087   |
| Flies        | % positive <i>E. coli</i> | 2025 | 0.78        | 0.51   | 1.21 | 0.276   | 2183 | 1.48            | 1.14   | 1.92 | 0.003   |
|              | log MPN <i>E. coli</i>    | 2025 | 0.93        | 0.77   | 1.12 | 0.462   | 2183 | 1.15            | 1.04   | 1.26 | 0.005   |
| Pond         | log MPN <i>E. coli</i>    | 1959 | 0.99        | 0.85   | 1.15 | 0.892   | 2111 | 1.11            | 1.00   | 1.23 | 0.058   |
| Soil         | log MPN <i>E. coli</i>    | 1995 | 1.12        | 0.97   | 1.29 | 0.126   | 2151 | 1.16            | 1.02   | 1.32 | 0.023   |

**Table S3** Bivariate associations between *E. coli* contamination along each pathway and bloody stool. Incident rate ratio (IRR; prospective analysis) and prevalence ratio (PR; cross-sectional analysis) estimates generated with generalized linear models. All models include robust standard errors at cluster level and adjust for season, monthly income, mother's education, and study arm. Prospective models also include an offset for child days at risk; n = number of children included in analysis.

| Pathway      | Indicator                 | n    | Prospective |        |      |         | n    | Cross-Sectional |        |      |         |
|--------------|---------------------------|------|-------------|--------|------|---------|------|-----------------|--------|------|---------|
|              |                           |      | IRR         | 95% CI |      | P-value |      | PR              | 95% CI |      | P-value |
| Tubewell     | % positive <i>E. coli</i> | 1974 | 0.77        | 0.39   | 1.53 | 0.461   | 1989 | 1.20            | 0.54   | 2.67 | 0.657   |
|              | log MPN <i>E. coli</i>    | 1974 | 0.73        | 0.46   | 1.16 | 0.183   | 1989 | 1.09            | 0.68   | 1.76 | 0.713   |
| Stored water | % positive <i>E. coli</i> | 1922 | 1.70        | 0.80   | 3.62 | 0.170   | 1937 | 1.05            | 0.39   | 2.81 | 0.924   |
|              | log MPN <i>E. coli</i>    | 1922 | 1.18        | 0.89   | 1.58 | 0.255   | 1937 | 0.86            | 0.55   | 1.35 | 0.520   |
| Hands        | % positive <i>E. coli</i> | 2111 | 1.91        | 1.04   | 3.51 | 0.036   | 2126 | 0.43            | 0.17   | 1.06 | 0.066   |
|              | log MPN <i>E. coli</i>    | 2111 | 1.37        | 0.97   | 1.94 | 0.070   | 2126 | 0.70            | 0.34   | 1.47 | 0.349   |
| Food         | % positive <i>E. coli</i> | 1950 | 2.64        | 1.17   | 5.98 | 0.020   | 1963 | 0.40            | 0.18   | 0.88 | 0.023   |
|              | log MPN <i>E. coli</i>    | 1950 | 1.34        | 1.07   | 1.68 | 0.010   | 1963 | 0.75            | 0.50   | 1.13 | 0.167   |
| Flies        | % positive <i>E. coli</i> | 2166 | 1.31        | 0.65   | 2.62 | 0.450   | 2181 | 0.15            | 0.02   | 1.09 | 0.062   |
|              | log MPN <i>E. coli</i>    | 2166 | 1.08        | 0.82   | 1.44 | 0.580   | 2181 | 0.41            | 0.14   | 1.20 | 0.104   |
| Pond         | log MPN <i>E. coli</i>    | 2094 | 0.98        | 0.76   | 1.25 | 0.847   | 2109 | 1.02            | 0.75   | 1.38 | 0.904   |
| Soil         | log MPN <i>E. coli</i>    | 2135 | 1.19        | 0.86   | 1.65 | 0.293   | 2150 | 0.70            | 0.52   | 0.94 | 0.019   |

**Table S4** Bivariate associations between *E. coli* contamination along each pathway and subsequent negative control outcomes rash and bruise (7-day prevalence) measured a median of 6-days after exposure measurements. Prevalence ratio estimates generated with generalized linear models. All models include robust standard errors at cluster level and adjust for season, monthly income, mother's education, and study arm. n = number of children included in analysis.

| Pathway      | Indicator                 | Rash (prospective) |      |        |         |       | Bruise (prospective) |      |        |         |       |
|--------------|---------------------------|--------------------|------|--------|---------|-------|----------------------|------|--------|---------|-------|
|              |                           | n                  | PR   | 95% CI | P-value |       | n                    | PR   | 95% CI | P-value |       |
| Tubewell     | % positive <i>E. coli</i> | 2774               | 1.15 | 0.88   | 1.50    | 0.307 | 2774                 | 1.10 | 0.77   | 1.56    | 0.600 |
|              | log MPN <i>E. coli</i>    | 2774               | 0.98 | 0.83   | 1.15    | 0.801 | 2774                 | 0.97 | 0.75   | 1.26    | 0.821 |
| Stored water | % positive <i>E. coli</i> | 2709               | 0.97 | 0.76   | 1.24    | 0.812 | 2709                 | 0.81 | 0.55   | 1.20    | 0.301 |
|              | log MPN <i>E. coli</i>    | 2709               | 1.00 | 0.89   | 1.12    | 0.968 | 2709                 | 0.95 | 0.80   | 1.13    | 0.577 |
| Hands        | % positive <i>E. coli</i> | 2936               | 1.01 | 0.80   | 1.28    | 0.945 | 2936                 | 1.04 | 0.79   | 1.38    | 0.768 |
|              | log MPN <i>E. coli</i>    | 2936               | 1.08 | 0.95   | 1.23    | 0.254 | 2936                 | 0.97 | 0.79   | 1.18    | 0.740 |
| Food         | % positive <i>E. coli</i> | 2733               | 1.13 | 0.92   | 1.40    | 0.243 | 2733                 | 1.04 | 0.73   | 1.47    | 0.838 |
|              | log MPN <i>E. coli</i>    | 2733               | 1.03 | 0.95   | 1.12    | 0.459 | 2733                 | 1.00 | 0.87   | 1.16    | 0.981 |
| Flies        | % positive <i>E. coli</i> | 3032               | 0.84 | 0.63   | 1.12    | 0.240 | 3032                 | 1.19 | 0.80   | 1.76    | 0.390 |
|              | log MPN <i>E. coli</i>    | 3032               | 0.99 | 0.88   | 1.11    | 0.857 | 3032                 | 1.11 | 0.95   | 1.29    | 0.203 |
| Pond         | log MPN <i>E. coli</i>    | 2925               | 1.00 | 0.91   | 1.09    | 0.951 | 2925                 | 0.90 | 0.79   | 1.03    | 0.129 |
| Soil         | log MPN <i>E. coli</i>    | 2990               | 1.00 | 0.91   | 1.10    | 0.940 | 2990                 | 0.95 | 0.82   | 1.10    | 0.520 |

**Table S5** Bivariate associations between *E. coli* contamination along each pathway and illness for the control group only. Incident rate ratio (IRR; prospective analysis) estimates generated with generalized linear models. All models include robust standard errors at cluster level and adjust for season, monthly income, mother's education, and an offset for child days at risk; n = number of children included in analysis.

| Pathway      | Indicator                 | WHO Defined Diarrhea |      |        |         |       | Caregiver Defined Diarrhea |      |        |         |       | Bloody Stool |      |        |         |       |
|--------------|---------------------------|----------------------|------|--------|---------|-------|----------------------------|------|--------|---------|-------|--------------|------|--------|---------|-------|
|              |                           | n                    | IRR  | 95% CI | P-value |       | n                          | IRR  | 95% CI | P-value |       | n            | IRR  | 95% CI | P-value |       |
| Tubewell     | % positive <i>E. coli</i> | 593                  | 0.76 | 0.42   | 1.38    | 0.365 | 628                        | 1.05 | 0.60   | 1.84    | 0.865 | 667          | 0.30 | 0.07   | 1.32    | 0.111 |
|              | log MPN <i>E. coli</i>    | 593                  | 0.77 | 0.48   | 1.24    | 0.284 | 628                        | 0.93 | 0.62   | 1.39    | 0.731 | 667          | 0.22 | 0.04   | 1.25    | 0.088 |
| Stored water | % positive <i>E. coli</i> | 527                  | 0.97 | 0.56   | 1.69    | 0.918 | 558                        | 0.78 | 0.44   | 1.37    | 0.386 | 593          | 1.41 | 0.33   | 6.00    | 0.640 |
|              | log MPN <i>E. coli</i>    | 527                  | 0.89 | 0.72   | 1.10    | 0.267 | 558                        | 0.93 | 0.74   | 1.17    | 0.539 | 593          | 1.11 | 0.69   | 1.80    | 0.662 |
| Hands        | % positive <i>E. coli</i> | 625                  | 2.31 | 1.52   | 3.51    | 0.000 | 661                        | 1.66 | 1.04   | 2.66    | 0.033 | 703          | 1.08 | 0.44   | 2.65    | 0.871 |
|              | log MPN <i>E. coli</i>    | 625                  | 1.40 | 1.11   | 1.77    | 0.005 | 661                        | 1.41 | 1.13   | 1.76    | 0.003 | 703          | 0.71 | 0.32   | 1.60    | 0.413 |
| Food         | % positive <i>E. coli</i> | 578                  | 1.21 | 0.76   | 1.91    | 0.422 | 611                        | 1.11 | 0.68   | 1.80    | 0.678 | 651          | 1.55 | 0.42   | 5.74    | 0.515 |
|              | log MPN <i>E. coli</i>    | 578                  | 1.07 | 0.84   | 1.36    | 0.565 | 611                        | 1.14 | 0.91   | 1.43    | 0.263 | 651          | 1.18 | 0.74   | 1.90    | 0.488 |
| Flies        | % positive <i>E. coli</i> | 645                  | 1.24 | 0.68   | 2.25    | 0.487 | 681                        | 0.97 | 0.50   | 1.90    | 0.940 | 724          | 1.17 | 0.30   | 4.53    | 0.823 |
|              | log MPN <i>E. coli</i>    | 645                  | 1.04 | 0.82   | 1.30    | 0.766 | 681                        | 1.04 | 0.80   | 1.34    | 0.791 | 724          | 0.83 | 0.46   | 1.50    | 0.546 |
| Pond         | log MPN <i>E. coli</i>    | 623                  | 1.02 | 0.82   | 1.28    | 0.830 | 658                        | 1.14 | 0.90   | 1.44    | 0.290 | 700          | 0.65 | 0.38   | 1.11    | 0.116 |
| Soil         | log MPN <i>E. coli</i>    | 636                  | 0.94 | 0.77   | 1.14    | 0.534 | 671                        | 0.98 | 0.79   | 1.20    | 0.815 | 713          | 0.72 | 0.49   | 1.07    | 0.102 |

**Table S6** Subgroup analyses showing bivariate associations between illness and *E. coli* contamination along each pathway by season (rainy and dry). Incidence rate ratio (IRR; prospective analysis) estimates generated with generalized linear models. All models include robust standard errors at cluster level and adjust for monthly income, mother's education, and an offset for child days at risk; n = number of children included in analysis.

| <b>WHO defined diarrhea</b>       |                           | <b>Rainy</b> |            |               |      |                | <b>Dry</b> |            |               |      |                |
|-----------------------------------|---------------------------|--------------|------------|---------------|------|----------------|------------|------------|---------------|------|----------------|
| <b>Pathway</b>                    | <b>Indicator</b>          | <b>n</b>     | <b>IRR</b> | <b>95% CI</b> |      | <b>P-value</b> | <b>n</b>   | <b>IRR</b> | <b>95% CI</b> |      | <b>P-value</b> |
| Tubewell                          | % positive <i>E. coli</i> | 775          | 0.64       | 0.36          | 1.14 | 0.132          | 982        | 1.09       | 0.70          | 1.68 | 0.707          |
|                                   | log MPN <i>E. coli</i>    | 775          | 0.67       | 0.40          | 1.14 | 0.141          | 982        | 0.81       | 0.58          | 1.12 | 0.199          |
| Stored water                      | % positive <i>E. coli</i> | 745          | 0.77       | 0.41          | 1.45 | 0.416          | 958        | 0.90       | 0.61          | 1.35 | 0.621          |
|                                   | log MPN <i>E. coli</i>    | 745          | 1.02       | 0.80          | 1.32 | 0.854          | 958        | 0.87       | 0.72          | 1.05 | 0.141          |
| Hands                             | % positive <i>E. coli</i> | 835          | 1.39       | 0.87          | 2.22 | 0.168          | 1040       | 1.57       | 1.16          | 2.13 | 0.003          |
|                                   | log MPN <i>E. coli</i>    | 835          | 1.14       | 0.90          | 1.46 | 0.274          | 1040       | 1.29       | 1.06          | 1.56 | 0.010          |
| Food                              | % positive <i>E. coli</i> | 750          | 1.29       | 0.75          | 2.22 | 0.355          | 981        | 1.30       | 0.95          | 1.78 | 0.107          |
|                                   | log MPN <i>E. coli</i>    | 750          | 1.13       | 0.92          | 1.38 | 0.238          | 981        | 1.10       | 0.96          | 1.27 | 0.153          |
| Flies                             | % positive <i>E. coli</i> | 858          | 0.96       | 0.54          | 1.71 | 0.889          | 1070       | 1.32       | 0.86          | 2.04 | 0.208          |
|                                   | log MPN <i>E. coli</i>    | 858          | 0.96       | 0.77          | 1.19 | 0.692          | 1070       | 1.16       | 0.98          | 1.38 | 0.088          |
| Pond                              | log MPN <i>E. coli</i>    | 844          | 0.82       | 0.64          | 1.06 | 0.129          | 1020       | 1.07       | 0.91          | 1.25 | 0.427          |
| Soil                              | log MPN <i>E. coli</i>    | 829          | 0.94       | 0.77          | 1.13 | 0.498          | 1071       | 1.03       | 0.89          | 1.19 | 0.682          |
| <b>Caregiver-defined diarrhea</b> |                           | <b>n</b>     | <b>IRR</b> | <b>95% CI</b> |      | <b>P-value</b> | <b>n</b>   | <b>IRR</b> | <b>95% CI</b> |      | <b>P-value</b> |
| Tubewell                          | % positive <i>E. coli</i> | 794          | 0.93       | 0.55          | 1.57 | 0.776          | 1054       | 0.75       | 0.44          | 1.26 | 0.276          |
|                                   | log MPN <i>E. coli</i>    | 794          | 0.87       | 0.57          | 1.31 | 0.504          | 1054       | 0.77       | 0.51          | 1.17 | 0.224          |
| Stored water                      | % positive <i>E. coli</i> | 765          | 0.99       | 0.53          | 1.84 | 0.963          | 1030       | 0.83       | 0.50          | 1.36 | 0.457          |
|                                   | log MPN <i>E. coli</i>    | 765          | 1.20       | 0.95          | 1.53 | 0.131          | 1030       | 0.83       | 0.65          | 1.04 | 0.111          |
| Hands                             | % positive <i>E. coli</i> | 855          | 1.29       | 0.80          | 2.08 | 0.302          | 1116       | 1.71       | 1.16          | 2.51 | 0.006          |
|                                   | log MPN <i>E. coli</i>    | 855          | 1.19       | 0.94          | 1.50 | 0.144          | 1116       | 1.43       | 1.13          | 1.81 | 0.003          |
| Food                              | % positive <i>E. coli</i> | 765          | 1.08       | 0.65          | 1.82 | 0.761          | 1055       | 1.20       | 0.80          | 1.80 | 0.371          |
|                                   | log MPN <i>E. coli</i>    | 765          | 1.11       | 0.92          | 1.34 | 0.259          | 1055       | 1.09       | 0.90          | 1.33 | 0.386          |
| Flies                             | % positive <i>E. coli</i> | 878          | 0.69       | 0.38          | 1.26 | 0.226          | 1147       | 0.87       | 0.48          | 1.60 | 0.657          |
|                                   | log MPN <i>E. coli</i>    | 878          | 0.92       | 0.72          | 1.17 | 0.509          | 1147       | 0.93       | 0.70          | 1.23 | 0.595          |
| Pond                              | log MPN <i>E. coli</i>    | 863          | 0.92       | 0.72          | 1.17 | 0.491          | 1096       | 1.04       | 0.85          | 1.26 | 0.716          |
| Soil                              | log MPN <i>E. coli</i>    | 847          | 1.00       | 0.81          | 1.24 | 0.986          | 1148       | 1.15       | 0.96          | 1.38 | 0.130          |
| <b>Blood in stool</b>             |                           | <b>n</b>     | <b>IRR</b> | <b>95% CI</b> |      | <b>P-value</b> | <b>n</b>   | <b>IRR</b> | <b>95% CI</b> |      | <b>P-value</b> |
| Tubewell                          | % positive <i>E. coli</i> | 841          | 0.72       | 0.30          | 1.73 | 0.462          | 1133       | 0.87       | 0.28          | 2.69 | 0.811          |
|                                   | log MPN <i>E. coli</i>    | 841          | 0.68       | 0.35          | 1.30 | 0.241          | 1133       | 0.82       | 0.42          | 1.61 | 0.567          |
| Stored water                      | % positive <i>E. coli</i> | 815          | 1.48       | 0.50          | 4.32 | 0.478          | 1107       | 2.06       | 0.70          | 6.03 | 0.188          |
|                                   | log MPN <i>E. coli</i>    | 815          | 1.34       | 0.96          | 1.89 | 0.089          | 1107       | 0.96       | 0.56          | 1.63 | 0.882          |
| Hands                             | % positive <i>E. coli</i> | 910          | 1.43       | 0.66          | 3.09 | 0.364          | 1201       | 2.56       | 1.03          | 6.37 | 0.043          |
|                                   | log MPN <i>E. coli</i>    | 910          | 0.96       | 0.54          | 1.71 | 0.885          | 1201       | 1.93       | 1.26          | 2.95 | 0.003          |
| Food                              | % positive <i>E. coli</i> | 816          | 1.69       | 0.49          | 5.90 | 0.408          | 1134       | 3.50       | 1.36          | 8.98 | 0.009          |
|                                   | log MPN <i>E. coli</i>    | 816          | 1.23       | 0.87          | 1.74 | 0.240          | 1134       | 1.48       | 1.16          | 1.89 | 0.002          |
| Flies                             | % positive <i>E. coli</i> | 933          | 1.35       | 0.55          | 3.29 | 0.513          | 1233       | 1.10       | 0.32          | 3.79 | 0.876          |
|                                   | log MPN <i>E. coli</i>    | 933          | 1.04       | 0.73          | 1.49 | 0.815          | 1233       | 1.10       | 0.68          | 1.80 | 0.693          |
| Pond                              | log MPN <i>E. coli</i>    | 914          | 0.74       | 0.47          | 1.17 | 0.195          | 1180       | 1.27       | 0.92          | 1.75 | 0.144          |
| Soil                              | log MPN <i>E. coli</i>    | 901          | 1.05       | 0.62          | 1.78 | 0.852          | 1234       | 1.28       | 0.83          | 1.99 | 0.263          |
